# Supplementary material for: MicroRNA Genes and Their Target 3′-Untranslated Regions Are Infrequently Somatically Mutated in Ovarian Cancers
Source: PubMed Central journal article supplement (PMC3334977; doi:10.1371/journal.pone.0035805), 2012-04-20

**Figure S1**

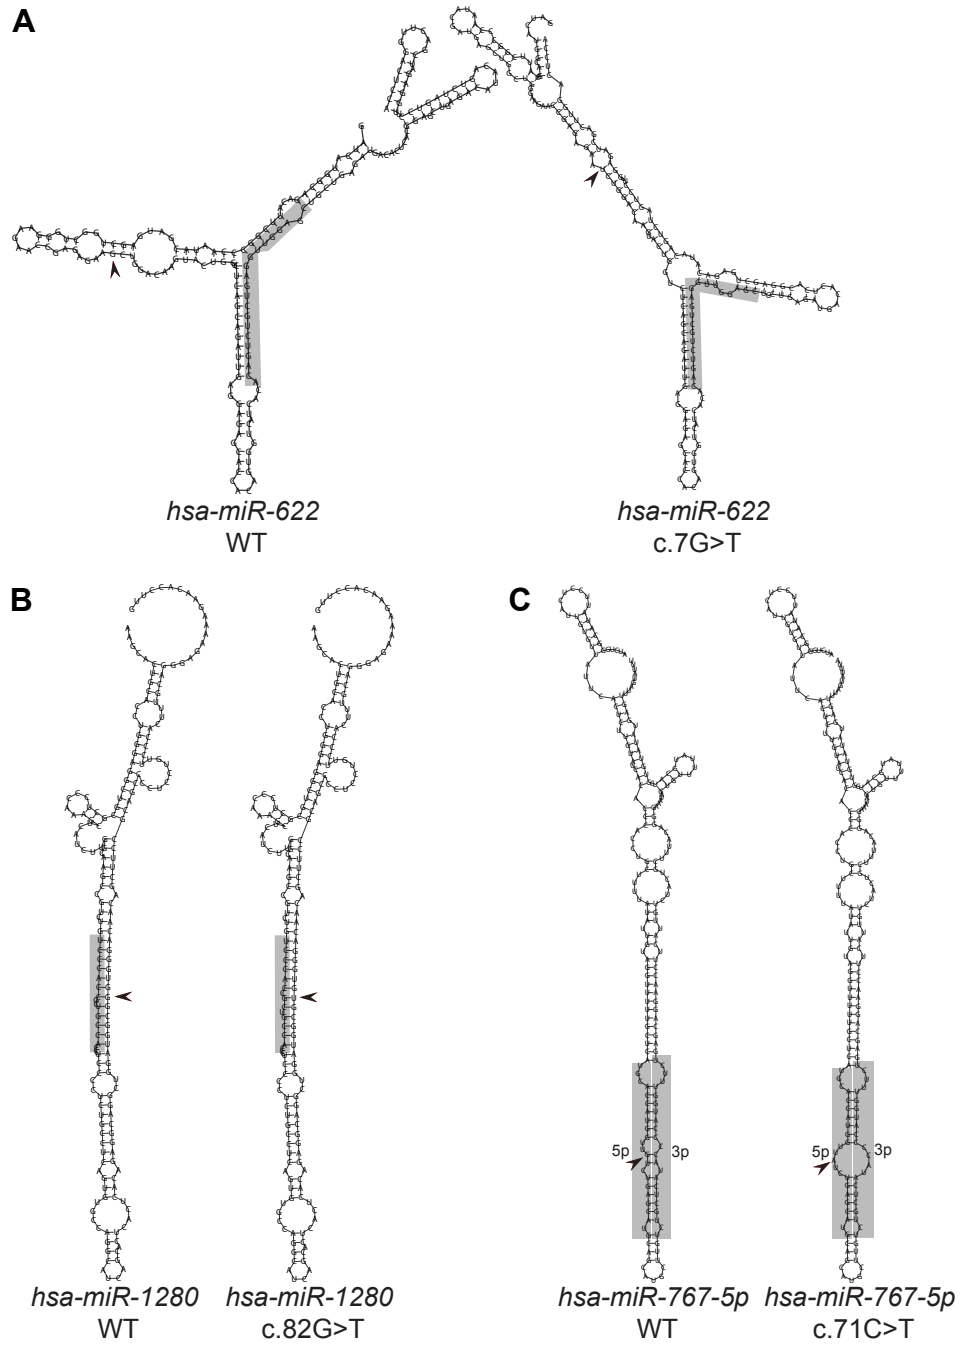

Supplement: pone.0035805.s001.pdf [file pone.0035805.s001.pdf]
